# Supplementary material
Source: bioRxiv or medRxiv preprint supplement (https://medrxiv.org/highwire/filestream/81562/field_highwire_adjunct_files/0/2020.05.15.20101097-1.pdf)
Supplement: Supplementary file [file 2020.05.15.20101097-1.pdf]

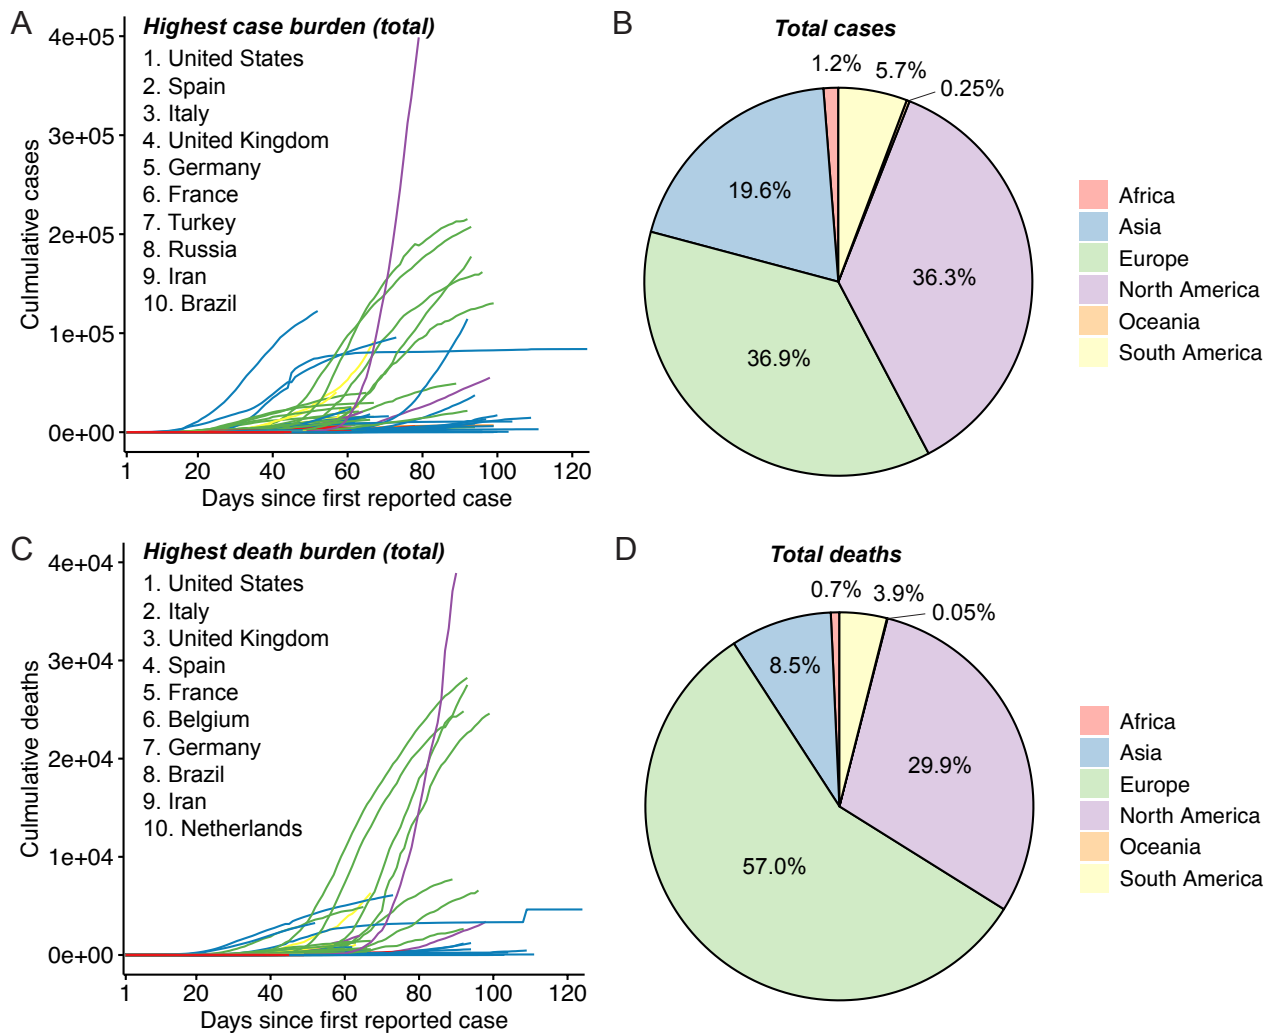

**Supplementary Figure 1. COVID-19 incidence and mortality by country and continent.**

(A) Cumulative COVID-19 cases by country since first reported case. Listed are countries with the highest total case burden since first reported case. Each country is colored by continent: Africa (red), Asia (blue), Europe (green), North America (purple), Oceania (orange), and South America (yellow). (B) Total COVID-19 cases by continent as of May 2, 2020 (percentage of total; a of cases): Europe (36.9%; 1,218,674), North America (36.3%; 1,200,825), Asia (19.6%; 648,855), South America (5.7%; 189,589), Africa (1.2%; 40,752), and Oceania (0.3%; 8,187). (C) Cumulative COVID-19 deaths by country since first reported case. Listed are countries with the highest total death burden since first reported case. Each country is colored by continent. (D) Total COVID-19 deaths by continent as of May 2, 2020 (percentage of total; number of deaths): Europe (57.0%; 135,792), North America (29.9%; 71,281), Asia (8.5%; 20,138), South America (3.9%; 9,403), Africa (0.7%; 1,690), and Oceania (0.1%; 120).
